# Supplementary material for: Enhancing Antioxidant Activities and Anti-Aging Effect of Rice Stem Cell Extracts by Plasma Treatment
Source: MDPI journal article supplement (doi:10.3390/app12062903), 2022-03-11
Supplement: s1 [file s1]

Archive with 1 entries (1 files):
- applsci-1529994-supplementary.pdf
